# Supplementary material
Source: Springer Nature journal article supplement (https://www.springermedizin.de/resource/supplementary/12882_2012_524_MOESM1_ESM.pdf/9454302)

**A**

Sham

Nx

Nx+STG

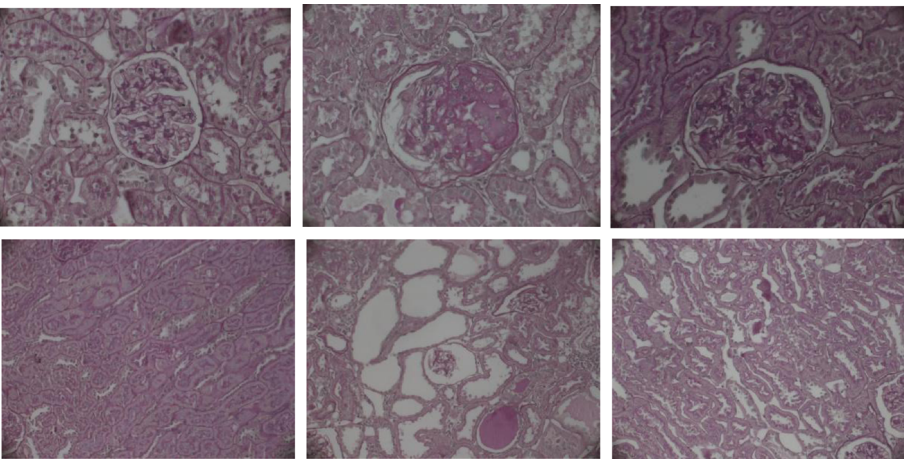**B**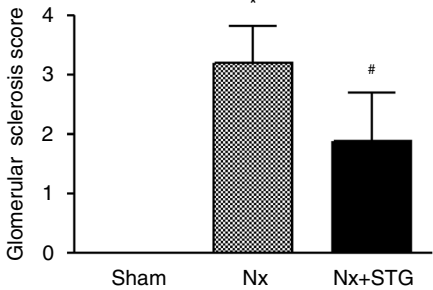**C**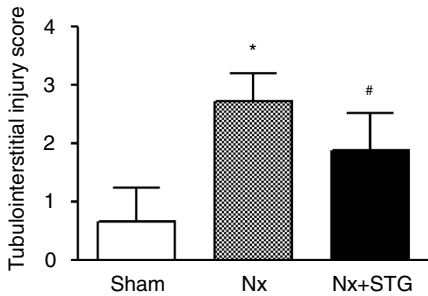

Supplement: MOESM1 [file 9454302]
